# Supplementary material for: Electrochemical detection of tocopherols in vegetable oils by supercritical fluid chromatography equipped with carbon fiber electrodes
Source: Royal Society of Chemistry journal article supplement (doi:10.1039/c8ay01054d), 2018-01-01
Supplement: c8ay01054d1.pdf [file c8ay01054d1.pdf]

**Supporting Information For**

**Electrochemical Detection of Tocopherols in Vegetable Oils by Supercritical Fluid  
Chromatography Equipped Carbon Fiber Electrode**

Kazuhiro Yamamoto, Akira Kotani, Hideki Hakamata

Department of Analytical Chemistry, School of Pharmacy, Tokyo University of  
Pharmacy and Life Sciences, Tokyo, 192-0392 Japan.

## Table of Contents

Title page

Figure S1. Chemical structures of tocopherols and IS

Figure S2. Effect of mixture ratio of mobile phase and modifier solvent

Figure S3. Effect of total flow rate

Figure S4. Calibration curve

Figure S5. Residual plot

Figure S6. Chromatograms of tocopherols in a standard mixture and safflower oil

Table S1. HPLC-UV conditions for the tocopherol determination

Table S2. Comparison of a content of  $\alpha$ -tocopherol in safflower oil determined by HPLC-UV and SFC-ECD

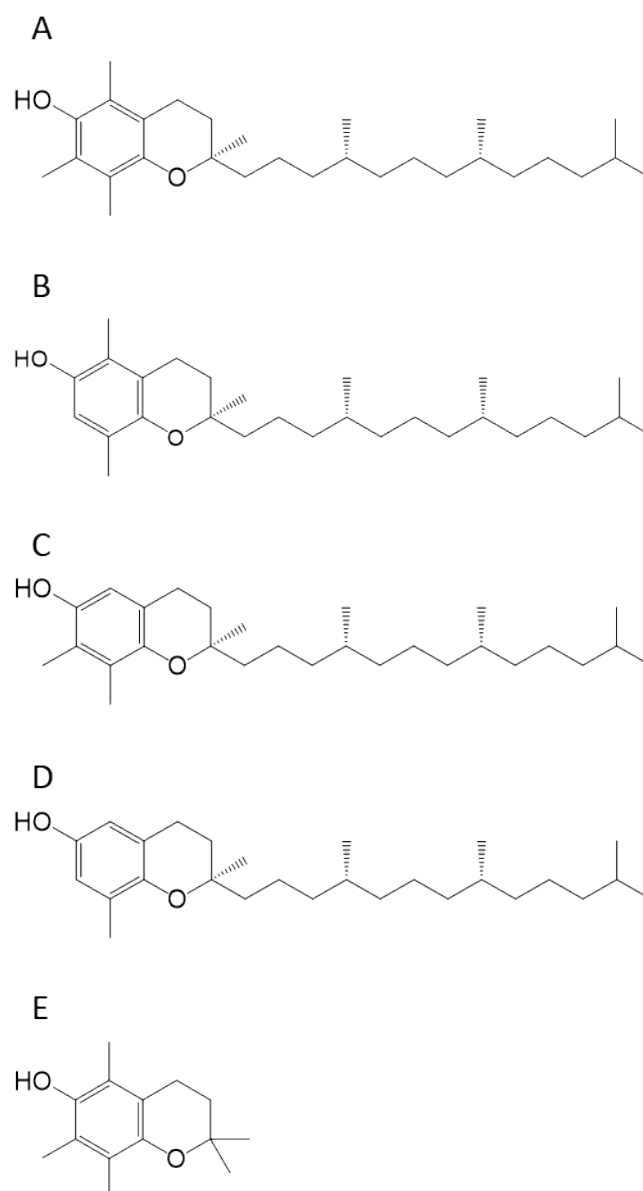

Figure S1. Chemical structure of (A)  $\alpha$ -tocopherol, (B)  $\beta$ -tocopherol, (C)  $\gamma$ -tocopherol, (D)  $\delta$ -tocopherol and (E) 2,2,5,7,8-pentamethyl-6-hydroxychroman.

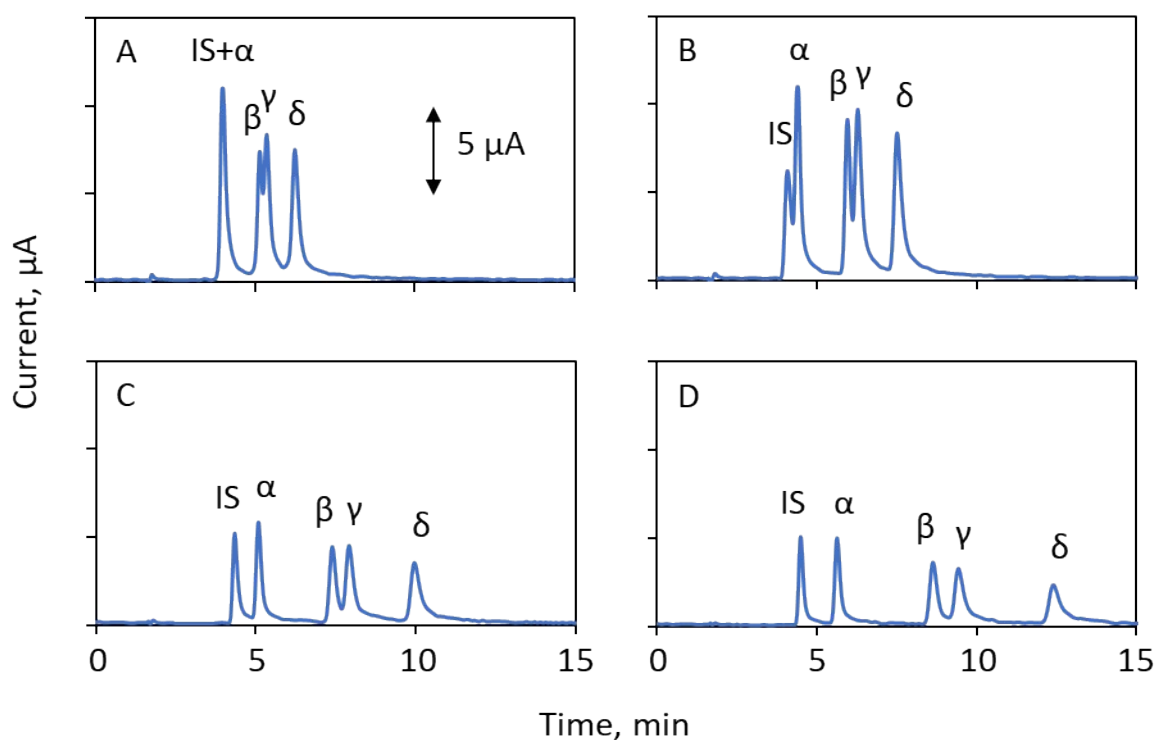

Figure S2. Chromatograms of 2,2,5,7,8-pentamethyl-6-hydroxychroman,  $\alpha$ -,  $\beta$ -,  $\gamma$ - and  $\delta$ -tocopherol standard solution obtained by the SFC-ECD system. A 100  $\mu\text{mol/L}$  of tocopherol standard mixture was injected. The ratio of mobile phase and modifier solvent were (A) 95:5, (B) 96:4, (C) 97:3 and (D) 98:2. Other analytical conditions of SFC-ECD system and the peak labels were the same as in Fig. 2.

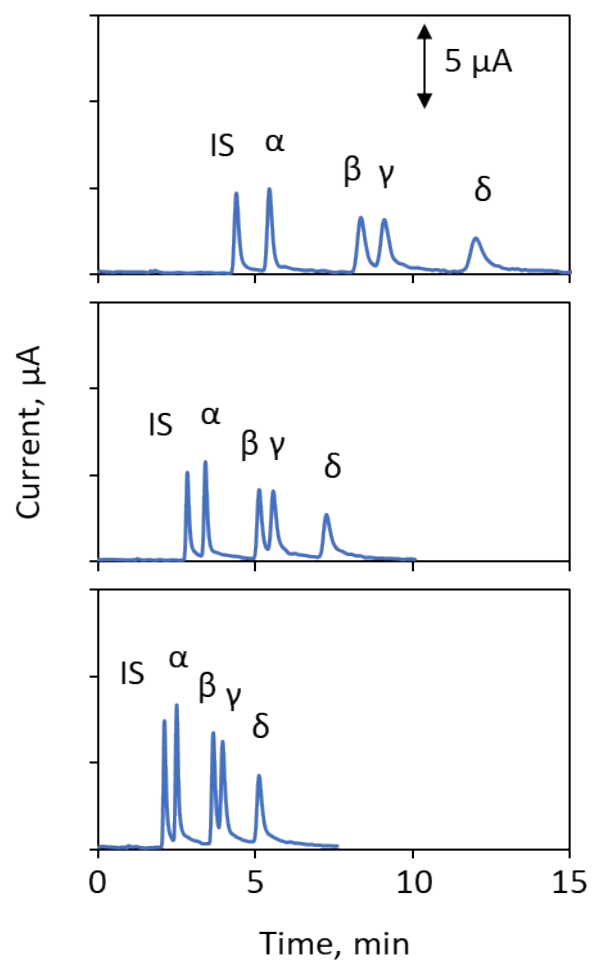

Figure S3. Chromatograms of tocopherol standard solution obtained by the SFC-ECD system. (A) 1.0 mL/min, (B) 1.5 mL/min and (C) 2.0 mL/min. The SFC-ECD system conditions except for the total flow rate and the peak labels were the same as in Fig. 2.

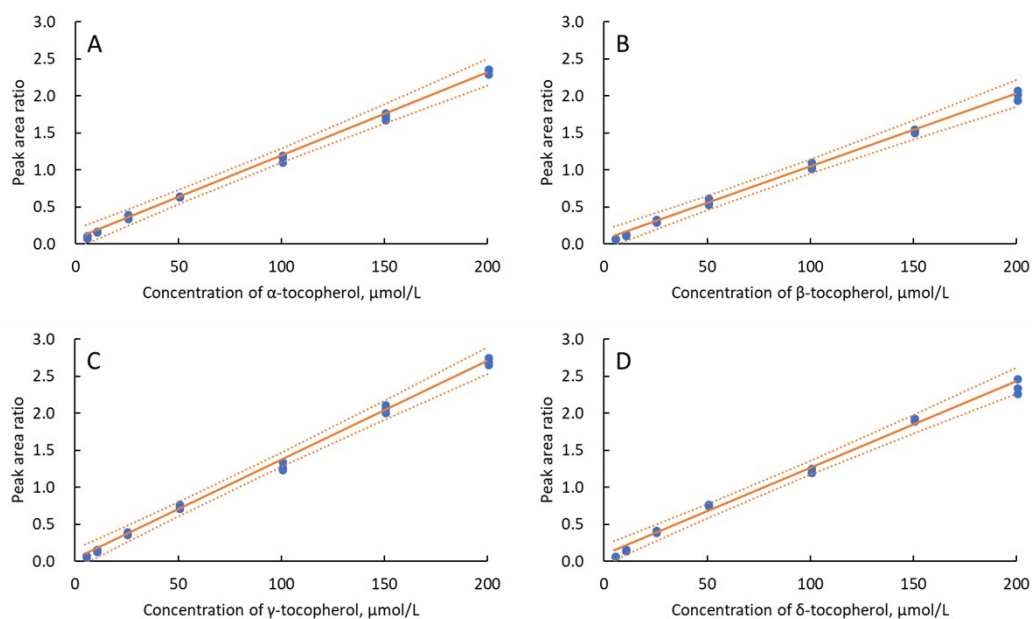

Figure S4. Calibration curve of (A)  $\alpha$ -tocopherol, (B)  $\beta$ -tocopherol, (C)  $\gamma$ -tocopherol and (D)  $\delta$ -tocopherol. Blue dots show each data point. Orange solid lines show the calibration curve and orange dashed lines show the upper and lower 95% confidence interval of calibration curve.

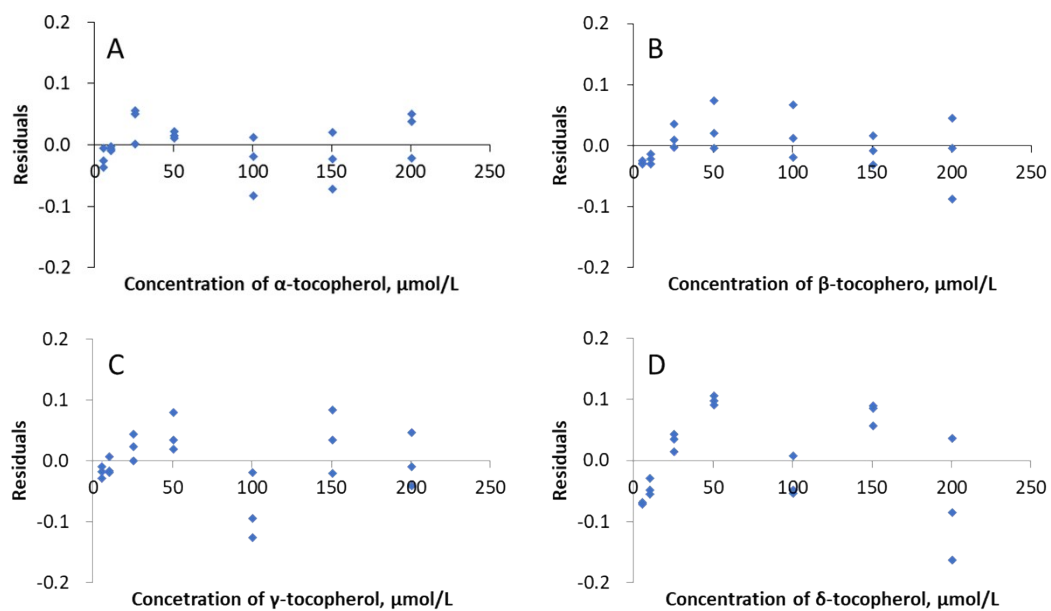

Figure S5. Residuals in (A)  $\alpha$ -tocopherol, (B)  $\beta$ -tocopherol, (C)  $\gamma$ -tocopherol and (D)  $\delta$ -tocopherol.

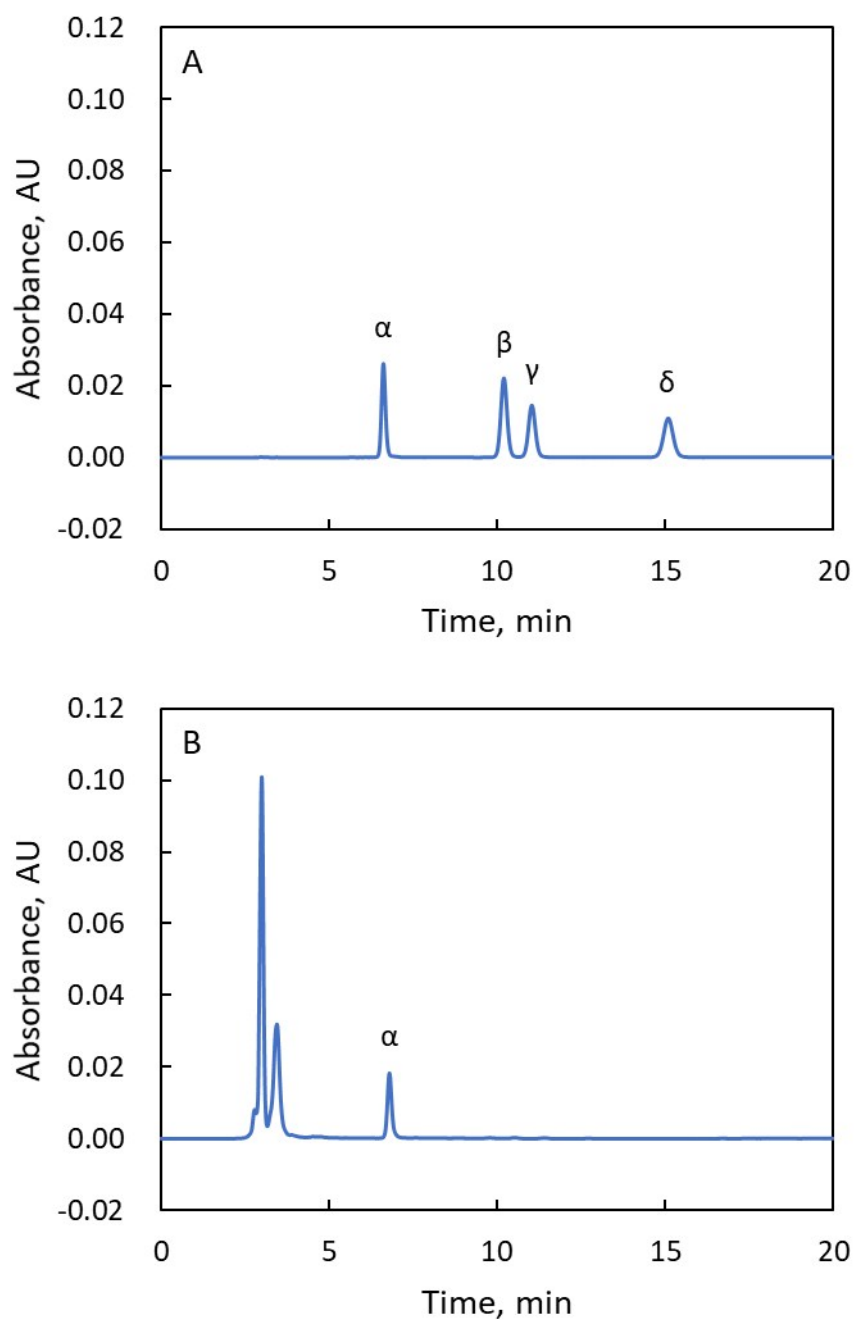

Fig. S6 Chromatograms of (A) 100  $\mu\text{mol/L}$  tocopherol standard mixture and (B) safflower oil obtained by HPLC-UV method. Sample preparation was performed as described in “Materials and methods” except for the addition of internal standard. Chromatographic conditions were shown in Table S1.

Table S1. HPLC-UV conditions

|                      |                                                        |
|----------------------|--------------------------------------------------------|
| Mobile phase         | Hexane / 2-propanol (98:2, v/v)                        |
| Flow rate            | 1.0 mL/min                                             |
| Column               | Inertsil NH2 (4.6 mm × 150 mm, 5 μm, GL Sciences Inc.) |
| Detection wavelength | 290 nm                                                 |
| Injection volume     | 10 μL                                                  |

These HPLC conditions were set in accordance with “Methods of Analysis in Health Science” of the Pharmaceutical Society of Japan. This method is regarded as a standard method.

Table S2.  $\alpha$ -tocopherol content in safflower oil (mg/g).

|                      | SFC-ECD            | HPLC-UV           |
|----------------------|--------------------|-------------------|
|                      | (Presented method) | (Standard method) |
| $\alpha$ -tocopherol | 0.39 $\pm$ 0.04    | 0.42 $\pm$ 0.01   |

Values indicate the content (mg/g)  $\pm$  SD (n=3).
